# Supplementary material for: Copy number amplification of ENSA promotes the progression of triple-negative breast cancer via cholesterol biosynthesis
Source: PubMed Central journal article supplement (PMC8831589; doi:10.1038/s41467-022-28452-z), 2022-02-10

### Supplementary Table 1. Characteristics of the organoids

| ID | Gender | Type | Grade | T (cm) | LN pos | LN | ER | PR | HER2 | KI67 | LVI |
|----|--------|------|-------|--------|--------|----|----|----|------|------|-----|
| 1  | Female | IDC  | III   | 2.6    | 0      | 28 | -  | -  | -    | 80%  | +   |
| 2  | Female | IDC  | III   | 5.5    | 25     | 27 | -  | -  | -    | 70%  | +   |
| 3  | Female | IDC  | III   | 2.5    | 0      | 4  | -  | -  | -    | 35%  | -   |

IDC: invasive ductal carcinoma; T: tumor size; LN pos: the number of positive lymph nodes; LN: the number of total lymph nodes measured; ER: estrogen receptor; PR: progesterone receptor; HER2: human epidermal growth factor receptor 2; LVI: lymphovascular invasion

**Supplementary Table 2. Clinicopathological features of the mini-PDXs**

| Sample ID | Gender | TNM    | Grade | Histopathologic type | ER | PR | HER2 |
|-----------|--------|--------|-------|----------------------|----|----|------|
| 543       | Female | T2N0M0 | II    | IDC                  | -  | -  | -    |
| 552       | Female | T2N0M0 | II    | IDC                  | -  | -  | -    |
| 553       | Female | T2N0M0 | III   | IDC                  | -  | -  | -    |
| 554       | Female | T1N0M0 | III   | IDC                  | -  | -  | -    |
| 573       | Female | T2N1M0 | III   | IDC                  | -  | -  | -    |
| 578       | Female | T1N0M0 | II    | IDC                  | -  | -  | -    |
| 584       | Female | T1N1M0 | III   | IDC                  | -  | -  | -    |

T: tumor size; N: lymph node; M: metastasis; IDC: invasive ductal carcinoma; ER: estrogen receptor; PR: progesterone receptor; HER2: human epidermal growth factor receptor 2.

**Supplementary Table 3. Multivariate cox regression analysis of RFS in 138 primary TNBC**

|                | Univariate Cox |                | Multivariate Cox |                |
|----------------|----------------|----------------|------------------|----------------|
|                | HR (95% CI)    | <i>P</i> value | HR (95% CI)      | <i>P</i> value |
| ENSA IHC score | 2.4            | 0.02           | 2.27             | 0.04           |
| High vs. Low   | (1.17-4.95)    |                | (1.06-4.86)      |                |
| Age            | 0.41           | 0.01           | 0.51             | 0.08           |
| ≥50y vs. <50y  | (0.20-0.84)    |                | (0.24-1.09)      |                |
| Tumor size     | 0.95           | 0.9            | 0.77             | 0.57           |
| ≥2cm vs. <2cm  | (0.38-2.36)    |                | (0.31-1.92)      |                |
| Lymph node     | 2.16           | 0.04           | 2.28             | 0.03           |
| N1-3 vs. N0    | (1.04-4.49)    |                | (1.06-4.91)      |                |

RFS: relapse-free survival; TNBC: triple-negative breast cancer; HR: hazard ratio; CI: confidence intervals; IHC: immunohistochemistry

**Supplementary Table 4. Multivariate cox regression analysis of OS in 138 primary TNBC**

|                | Univariate Cox |                | Multivariate Cox |                |
|----------------|----------------|----------------|------------------|----------------|
|                | HR (95% CI)    | <i>P</i> value | HR (95% CI)      | <i>P</i> value |
| ENSA IHC score | 4.1            | 0.03           | 1.36             | 0.07           |
| High vs. Low   | (1.16-14.56)   |                | (0.97-1.91)      |                |
| Age            | 0.24           | 0.04           | 0.34             | 0.13           |
| ≥50y vs. <50y  | (0.06-0.92)    |                | (0.08-1.41)      |                |
| Tumor size     | 2.42           | 0.41           | 1.59             | 0.66           |
| ≥2cm vs. <2cm  | (0.30-19.33)   |                | (0.19-12.96)     |                |
| Lymph node     | 3.25           | 0.09           | 2.78             | 0.15           |
| N1-3 vs. N0    | (0.84-12.58)   |                | (0.69-11.24)     |                |

OS: overall survival; TNBC: triple-negative breast cancer; HR: hazard ratio; CI: confidence intervals; IHC: immunohistochemistry

## Supplementary Table 5. A list of primers for RT-qPCR

---

|                |                         |
|----------------|-------------------------|
| ENSA-Forward   | AGGCAAAGCTAAAGGCCAAAT   |
| ENSA-Reverse   | GCCATGTTGTAGTCTCCTGAGT  |
| FDPS-Forward   | TGTGACCGGCAAAATTGGC     |
| FDPS-Reverse   | GCCCGTTGCAGACACTGAA     |
| DHCR7-Forward  | GCTGCAAAAATCGCAACCCAA   |
| DHCR7-Reverse  | GCTCGCCAGTGAAAACCAGT    |
| FDFT1-Forward  | CCACCCCGAAGAGTTCTACAA   |
| FDFT1-Reverse  | TGCGACTGGTCTGATTGAGATA  |
| ACAT2-Forward  | GCGGACCATCATAGGTTCCCT   |
| ACAT2-Reverse  | ACTGGCTTGTCTAACAGGATTCT |
| HMGCR-Forward  | TGATTGACCTTTCAGAGCAAG   |
| HMGCR-Reverse  | CTAAAATTGCCATTCCACGAGC  |
| EBP-Forward    | CTCAGCACCTAAGACTGGACA   |
| EBP-Reverse    | ACGACTAAGACCCCTGTGACA   |
| MVD-Forward    | CTCCCTGAGCGTCACTCTG     |
| MVD -Reverse   | GGTCCTCGGTGAAGTCCTTG    |
| MVK -Forward   | CATGGCAAGGTAGCACTGG     |
| MVK -Reverse   | GATACCAATGTTGGGTAAGCTGA |
| LSS-Forward    | GCACTGGACGGGTGATTATGG   |
| LSS-Reverse    | TCTCTTCTCTGTATCCGGCTG   |
| SREBF2-Forward | AACGGTCATTCACCCAGGTC    |
| SREBF2-Reverse | GGCTGAAGAATAGGAGTTGCC   |
| GAPDH-Forward  | GGAGCGAGATCCCTCCAAAAT   |
| GAPDH-Reverse  | GGCTGTTGTCATACTTCTCATGG |
| HMGCS1-Forward | GATGTGGGAATTGTTGCCCTT   |
| HMGCS1-Reverse | ATTGTCTCTGTTCCAACCTCCAG |

---

RT-qPCR: real-time quantitative reverse transcription.

**Supplementary Table 6. Detailed antibody usage**

| Name                                  | Company        | Application      | Dilution                    | Cat #      |
|---------------------------------------|----------------|------------------|-----------------------------|------------|
| ENSA                                  | Abcam          | Immunoblot       | 1:10000                     | ab180513   |
| ENSA                                  | Proteintech    | IHC              | 1:100                       | 14518-1-AP |
| MVK                                   | Affinity       | Immunoblot       | 1:1000                      | DF3238     |
| FDPS                                  | Proteintech    | Immunoblot; IHC  | WB: 1:3000; IHC: 1:200      | 16129-1-AP |
| ACAT2                                 | Abcam          | Immunoblot       | 1:3000                      | ab131215   |
| SREBP2                                | Abcam          | Immunoblot; IHC  | WB: 1:1000; IHC: 1:100      | ab30682    |
| SREBP2                                | Proteintech    | IHC              | 1:200                       | 28212-1-AP |
| LSS                                   | Abcam          | Immunoblot       | 1:3000                      | ab140124   |
| FDFT1                                 | Abcam          | Immunoblot       | 1:3000                      | ab195046   |
| HMGCR                                 | Abcam          | Immunoblot       | 1:3000                      | ab174830   |
| HMGCS1                                | Proteintech    | Immunoblot       | 1:1000                      | 17643-1-AP |
| FLAG                                  | Sigma-Aldrich  | Immunoblot       | 1:1000                      | F1804      |
| p-STAT3 (Tyr705)                      | Cell Signaling | Immunoblot; IHC  | 1:2000                      | 9145       |
| p-STAT3 (Ser 727)                     | Cell Signaling | Immunoblot       | 1:1000                      | 9134       |
| STAT3                                 | Cell Signaling | Immunoblot; ChIP | WB: 1:1000; ChIP: 4 $\mu$ g | 9139       |
| PP2AC                                 | Cell Signaling | Immunoblot       | 1:2000                      | 2038       |
| GAPDH                                 | Proteintech    | Immunoblot       | 1:10000                     | 60004-1-Ig |
| alpha tubulin                         | Proteintech    | Immunoblot       | 1:3000                      | 11224-1-AP |
| mouse IgG2a<br>isotype                | Cell Signaling | ChIP             | 4ug                         | 61656      |
| HRP-linked anti-<br>mouse antibodies  | Proteintech    | Immunoblot       | 1:5000                      | SA00001-1  |
| HRP-linked anti-<br>rabbit antibodies | Proteintech    | Immunoblot       | 1:5000                      | SA00001-2  |

Gene expression

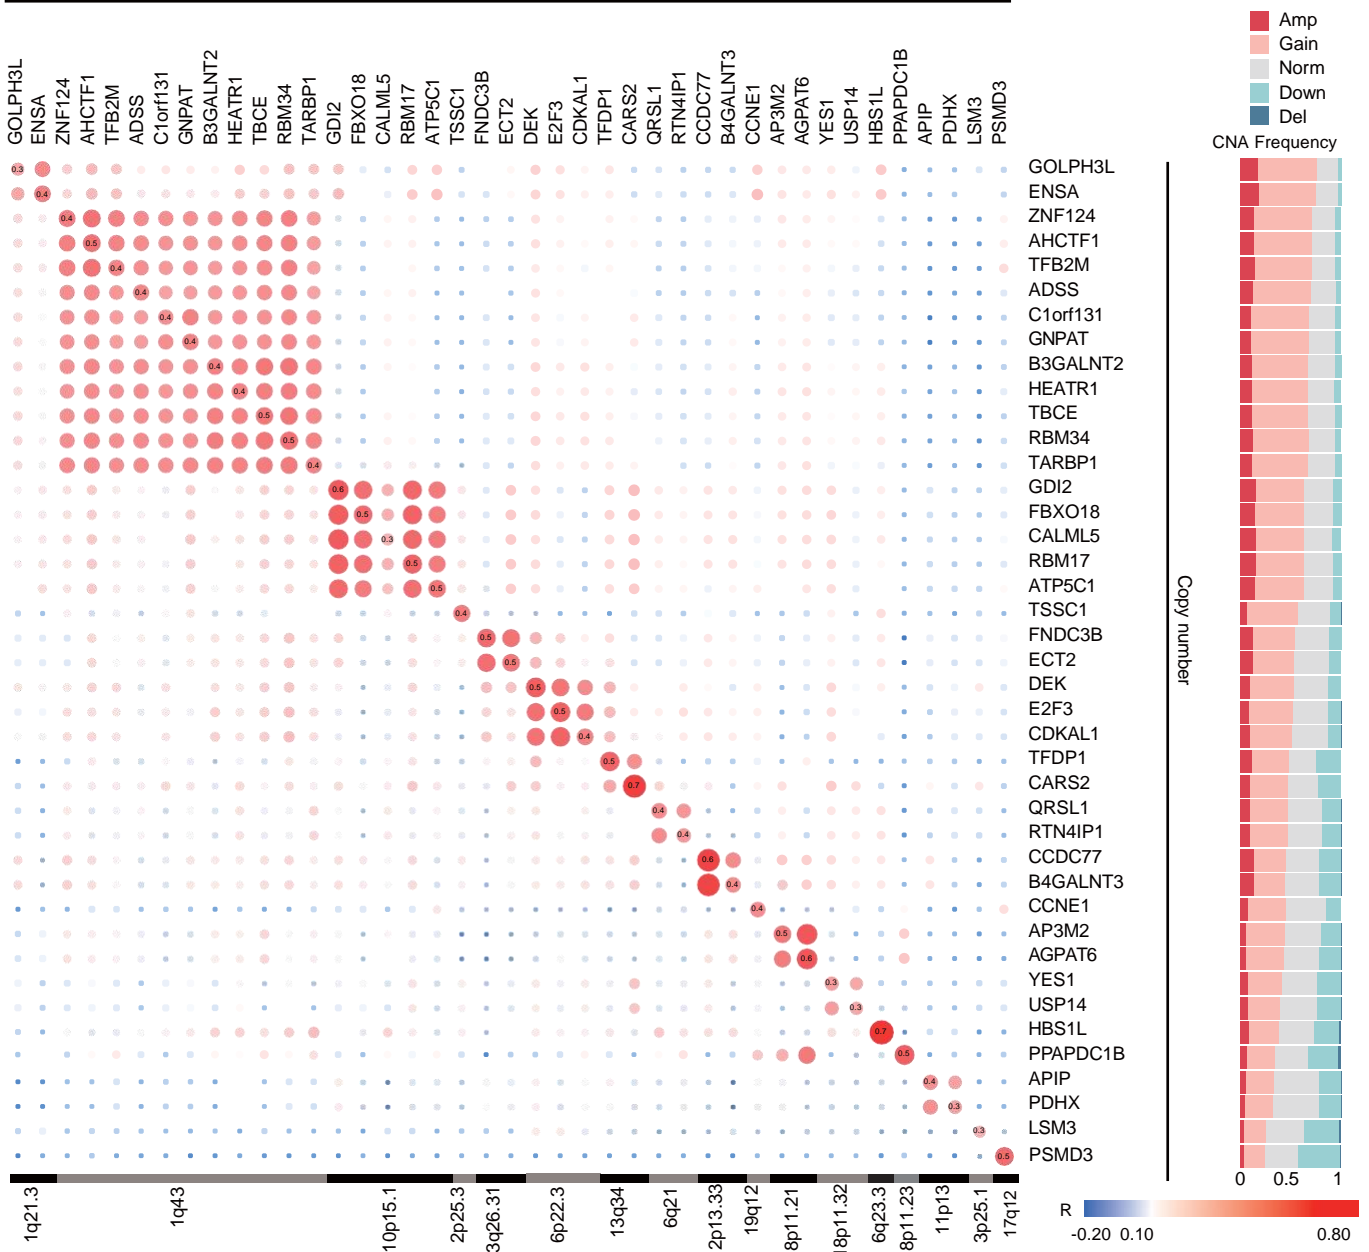

**Supplementary Fig. 1** The correlation between the expression and copy number of 41 candidates in 302 TNBC patients according to both RNA-seq data and copy number data. Genes were ranked by amplification and gain frequency. Correlation coefficients were calculated using the Pearson test. Amp, amplification; Norm, normal; Del, deletion.



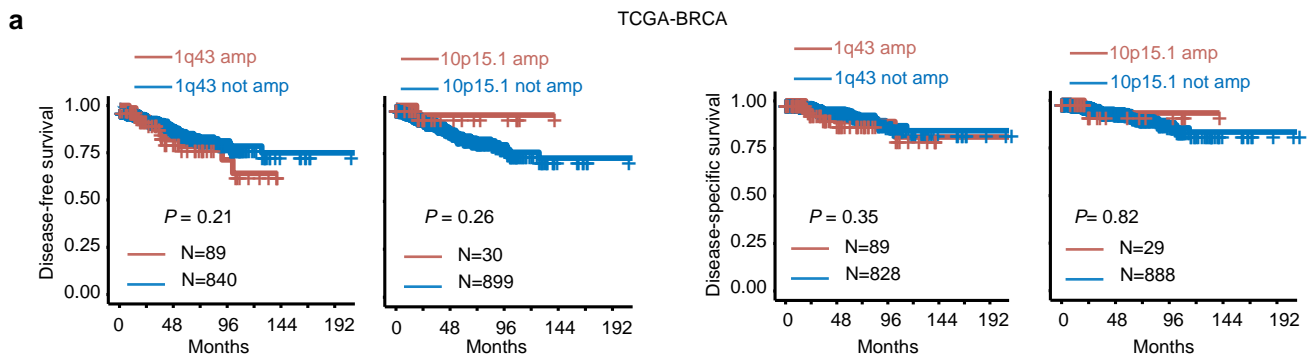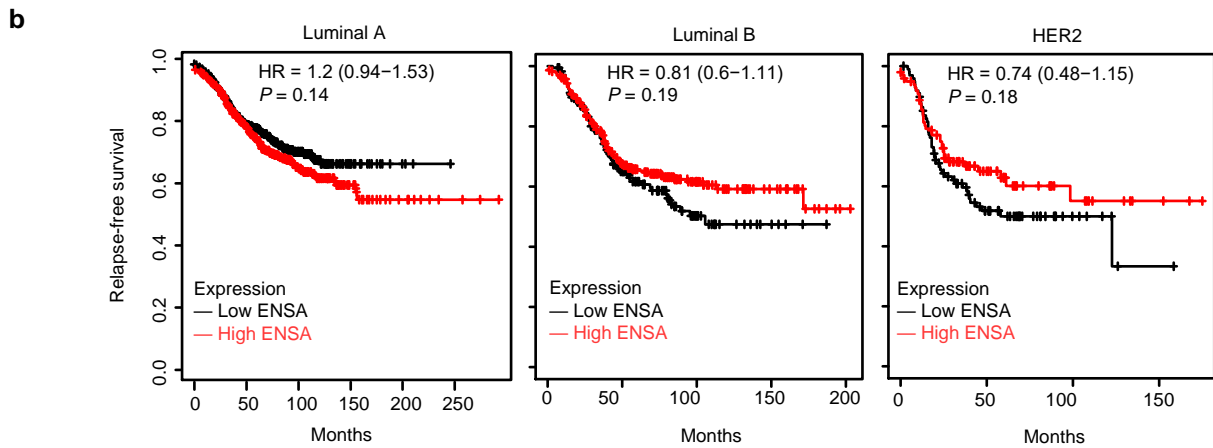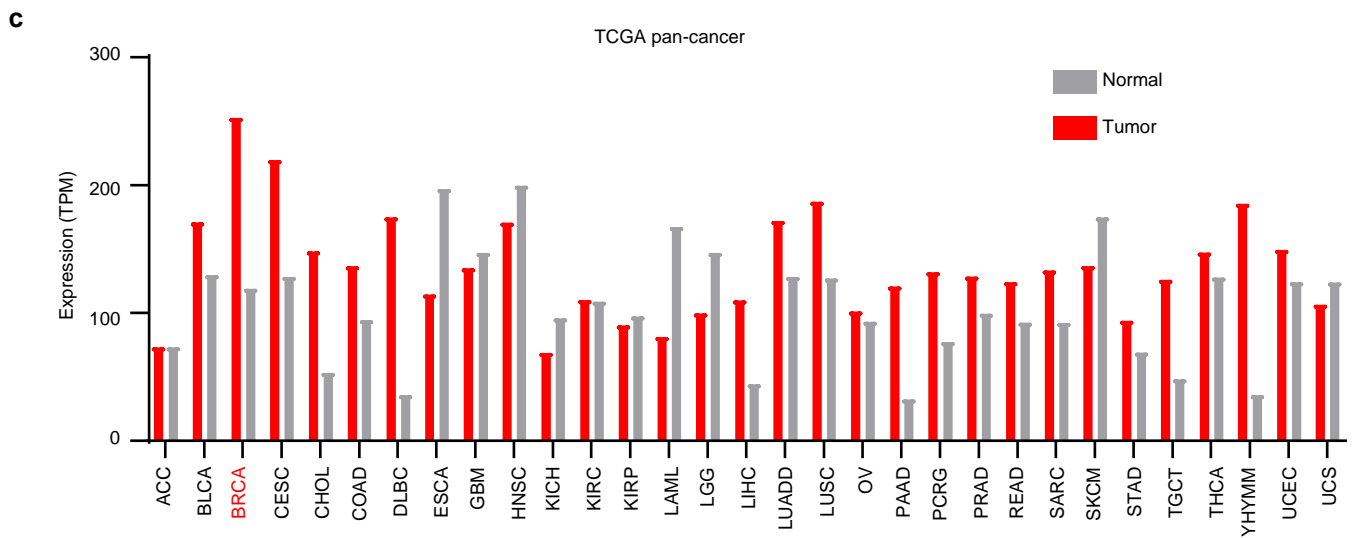

**Supplementary Fig. 2 ENSA transcriptome profile in breast cancer.** (a) Kaplan-Meier survival analysis of 1q43 and 10p15.1 copy number alteration in TCGA breast cancer patients. Log-rank test. (b) Kaplan-Meier plots of ENSA in the luminal A, luminal B and HER2 subtypes (<https://kmplot.com/analysis/>). Log-rank test. (c) ENSA mRNA levels in different cancers from the TCGA cohort. TCGA, The Cancer Genome Atlas; BRCA, breast cancer; amp, amplification. TPM, transcripts per million.

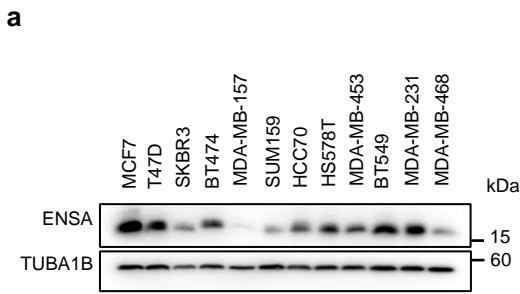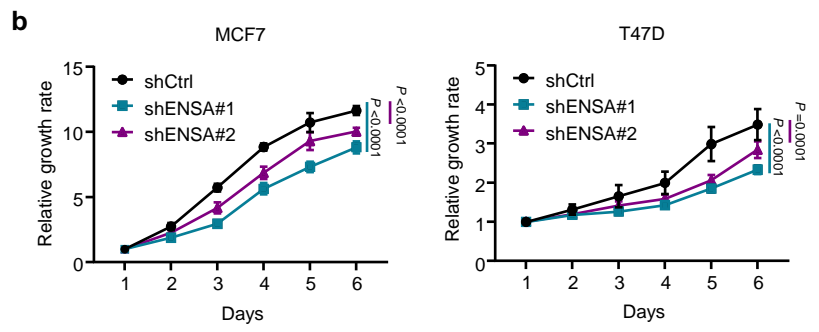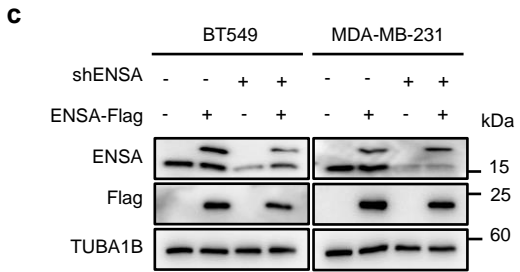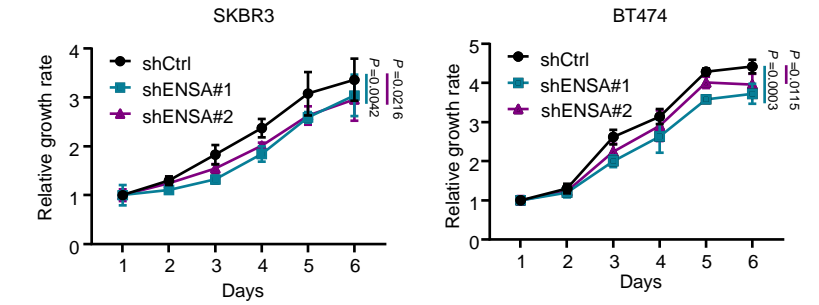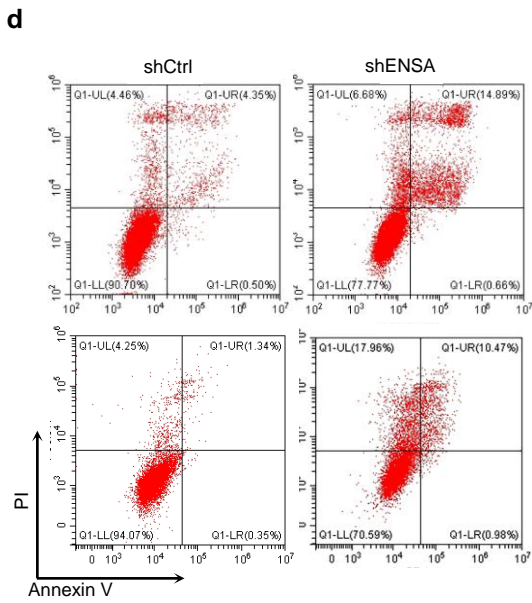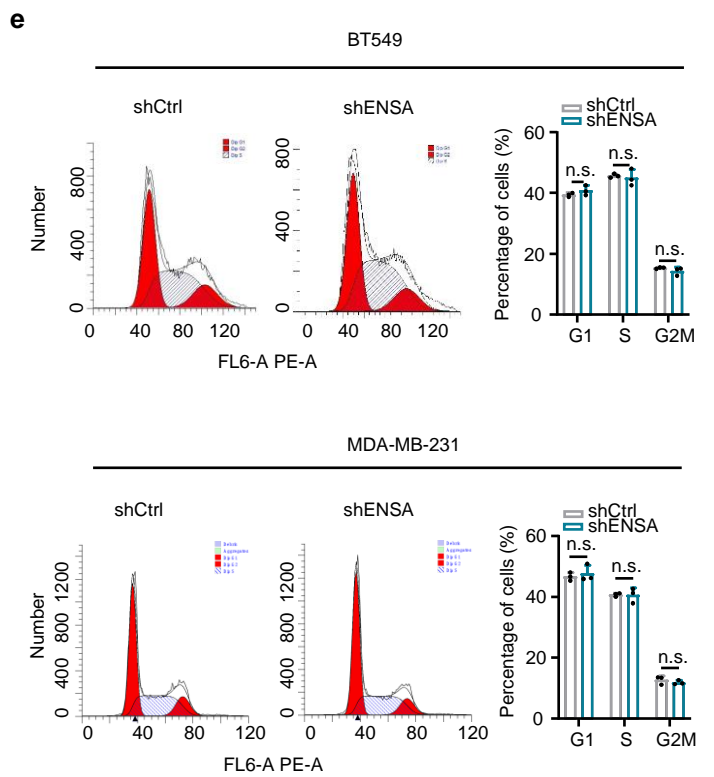

**Supplementary Fig. 3 ENSA promotes the survival of TNBC cells.** (a) The protein expression of ENSA across multiple breast cancer cell lines. (b) In vitro growth curves of MCF7, T47D, SKBR3, and BT474 cells expressing control or ENSA shRNA. n=6. Data are presented as mean  $\pm$  SD. Two-tailed two-way ANOVA tests. (c) Empty vector or flag-tagged ENSA overexpression vector was transfected into BT549 and MDA-MB-231 cells expressing control or ENSA shRNA. (d) Representative images of cell apoptosis in BT549 and MDA-MB-231 cells expressing control or ENSA shRNA. (e) Cell cycle distribution measured in BT549 and MDA-MB-231 cells expressing control or ENSA shRNA. Representative images and the percentage of cells in the G1/S/G2M phase are shown. n=3. Data are presented as mean  $\pm$  SD. Two-tailed unpaired Student's t tests. Source data are provided as a Source Data file. n.s., not significant.

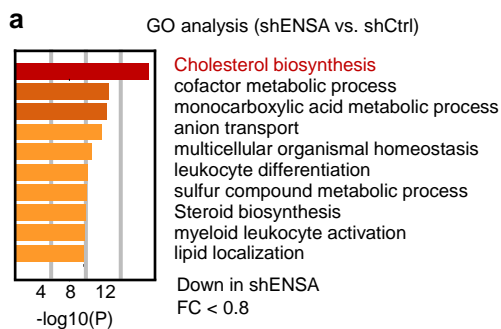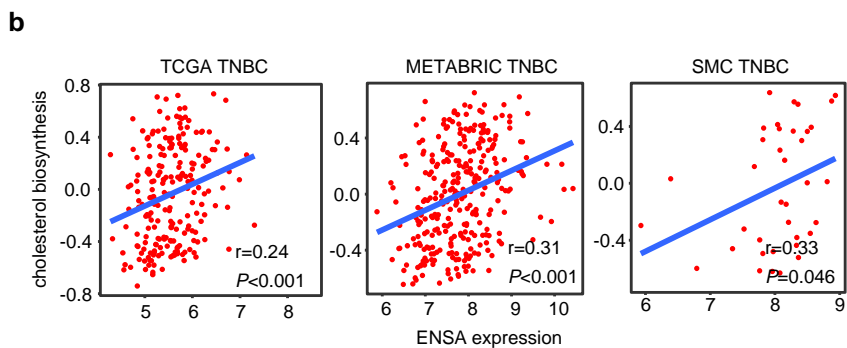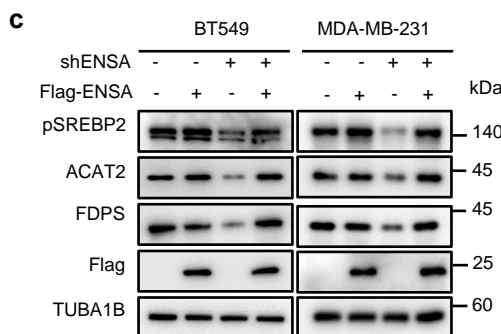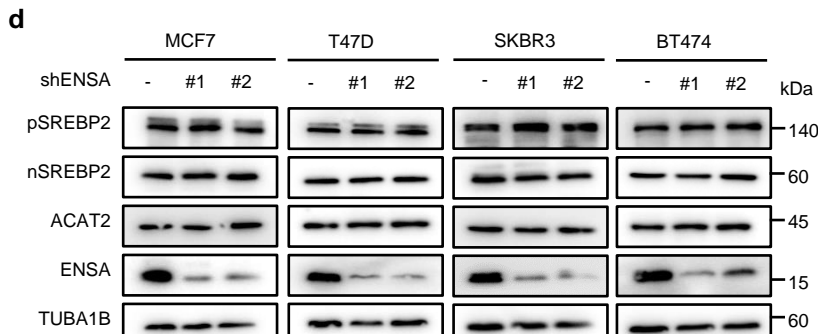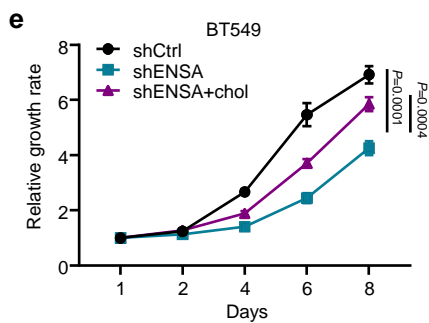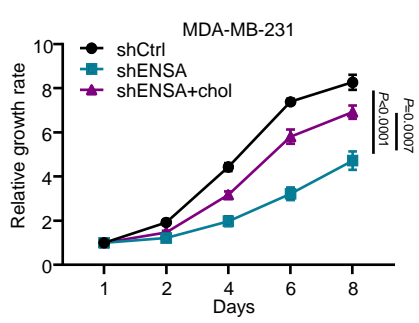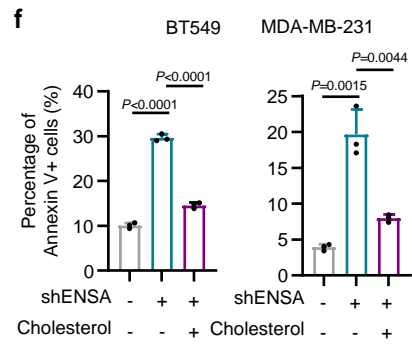

**Supplementary Fig. 4 ENSA impacts cholesterol biosynthesis in TNBC.** (a) GO analysis of downregulated genes after ENSA knockdown in MDA-MB-231 cells. Top 10 pathways according to  $-\log_{10}(P \text{ value})$  are shown. (b) Scatter plot showing the correlation of ENSA expression with the cholesterol biosynthesis pathway score in TCGA, METABRIC and SMC TNBC data identified by 'gsva' method. Correlation coefficients were calculated using the *Pearson* test. Two-tailed *P*-values were given. (c) Western blotting images showing proteins involved in the cholesterol biosynthesis pathway in BT549 and MDA-MB-231 cells  $\pm$  ENSA knockdown and  $\pm$  ENSA overexpression.  $n=3$  independent experiments. (d) Western blotting images showing proteins involved in the cholesterol biosynthesis pathway after ENSA knockdown in non-TNBC breast cancer cells.  $n=3$  independent experiments. (e) In vitro growth curves of BT549 and MDA-MB-231 cells expressing control or ENSA shRNA after treatment with 2.5  $\mu\text{g/ml}$  exogenous cholesterol.  $n=3$ . Data are presented as mean  $\pm$  SD. Two-tailed two-way ANOVA tests. (f) Cell apoptosis measured in BT549 and MDA-MB-231 cells expressing control or ENSA shRNA after treatment with 2.5  $\mu\text{g/ml}$  exogenous cholesterol.  $n=3$ . Data are presented as mean  $\pm$  SD. Two-tailed unpaired Student's *t* tests. Source data are provided as a Source Data file. GO, Gene Ontology; FC, fold change; TCGA, The Cancer Genome Atlas; METABRIC, Molecular Taxonomy of Breast Cancer International Consortium; SMC, a Korean breast cancer cohort; chol, cholesterol.

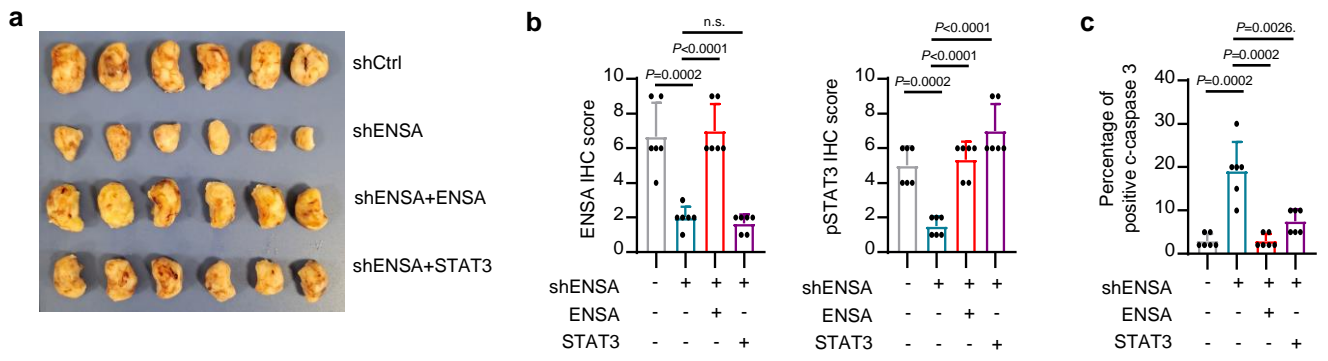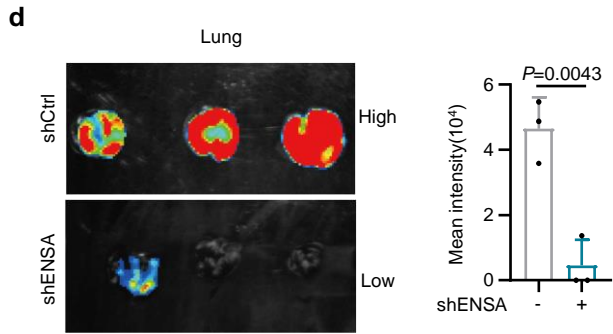

**Supplementary Fig. 5 ENSA/STAT3 promotes TNBC progression in vivo.** (a) Representative images of tumors generated by injecting MDA-MB-231 cells expressing control or ENSA shRNA and rescued by ENSA or STAT3 overexpression. (b) Immunohistochemical scores of ENSA and pSTAT3-Tyr705 in mouse mammary fat pad xenograft models generated by injecting MDA-MB-231 cells expressing control or ENSA shRNA and rescued by ENSA or STAT3 overexpression. n=6. Data are presented as mean  $\pm$  SD. Two-tailed unpaired Student's t tests. (c) Percentage of cleaved caspase 3-positive cells in mouse mammary fat pad xenograft models. n=6. Data are presented as mean  $\pm$  SD. Two-tailed unpaired Student's t tests. (d) The bioluminescence intensities of lung metastasis of MDA-MB-231 cells expressing control or ENSA shRNA. n=3. Data are presented as mean  $\pm$  SD. Two-tailed unpaired Student's t tests. Source data are provided as a Source Data file. c-caspase 3, cleaved caspase 3. n.s., not significant.



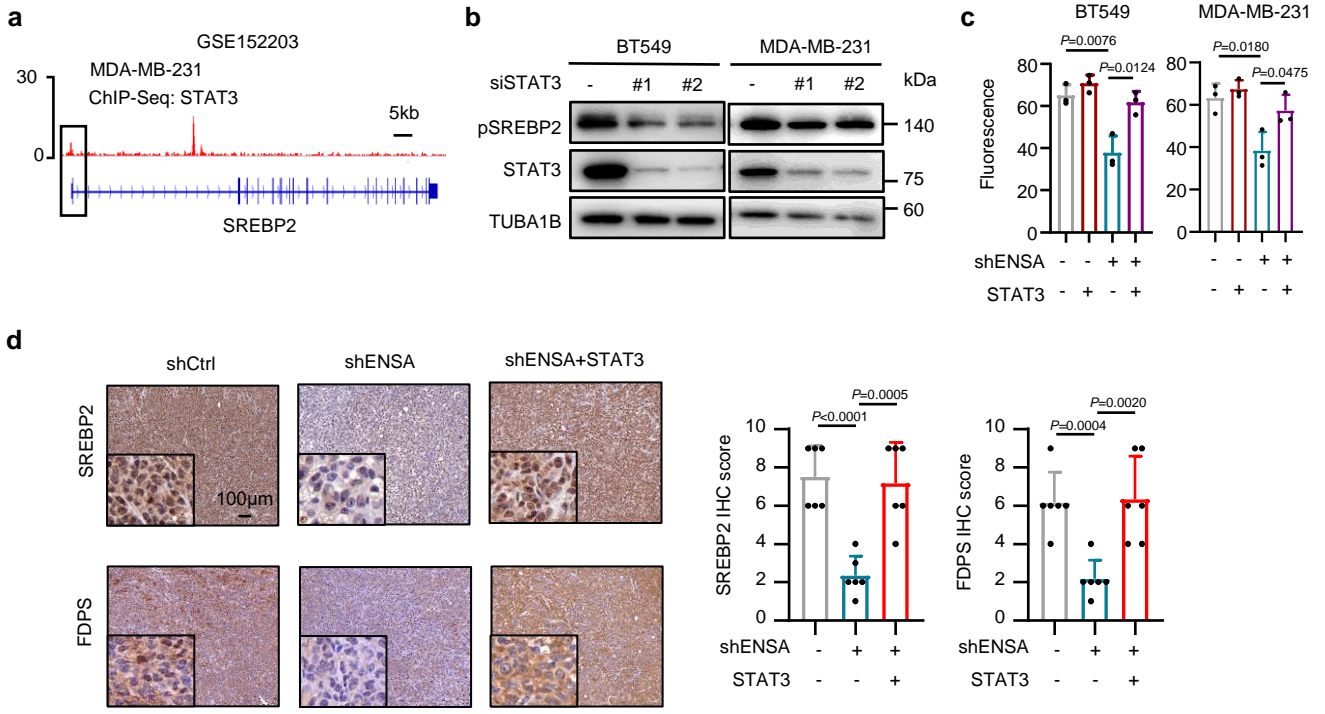

**Supplementary Fig. 6 ENSA mediates the transcriptional activation of SREBP2 via PP2A-STAT3.** (a) STAT3 ChIP-seq signal in MDA-MB-231 cells at the genomic location adjacent to the SREBP2 promoter from GSE152203. (b) Western blotting images showing SREBP2 expression in BT549 and MDA-MB-231 cells expressing control or STAT3 siRNA. (c) Fluorescence quantification of Filipin staining. n=3. Data are presented as mean  $\pm$  SD. Two-tailed unpaired Student's t tests. (d) Immunohistochemical images and scores of SREBP2 and FDPS in mouse mammary fat pad xenograft models generated by injecting MDA-MB-231 cells expressing control or ENSA shRNA and rescued by STAT3 overexpression. n=6. Data are presented as mean  $\pm$  SD. Two-tailed unpaired Student's t tests. Source data are provided as a Source Data file. IHC, immunohistochemistry.

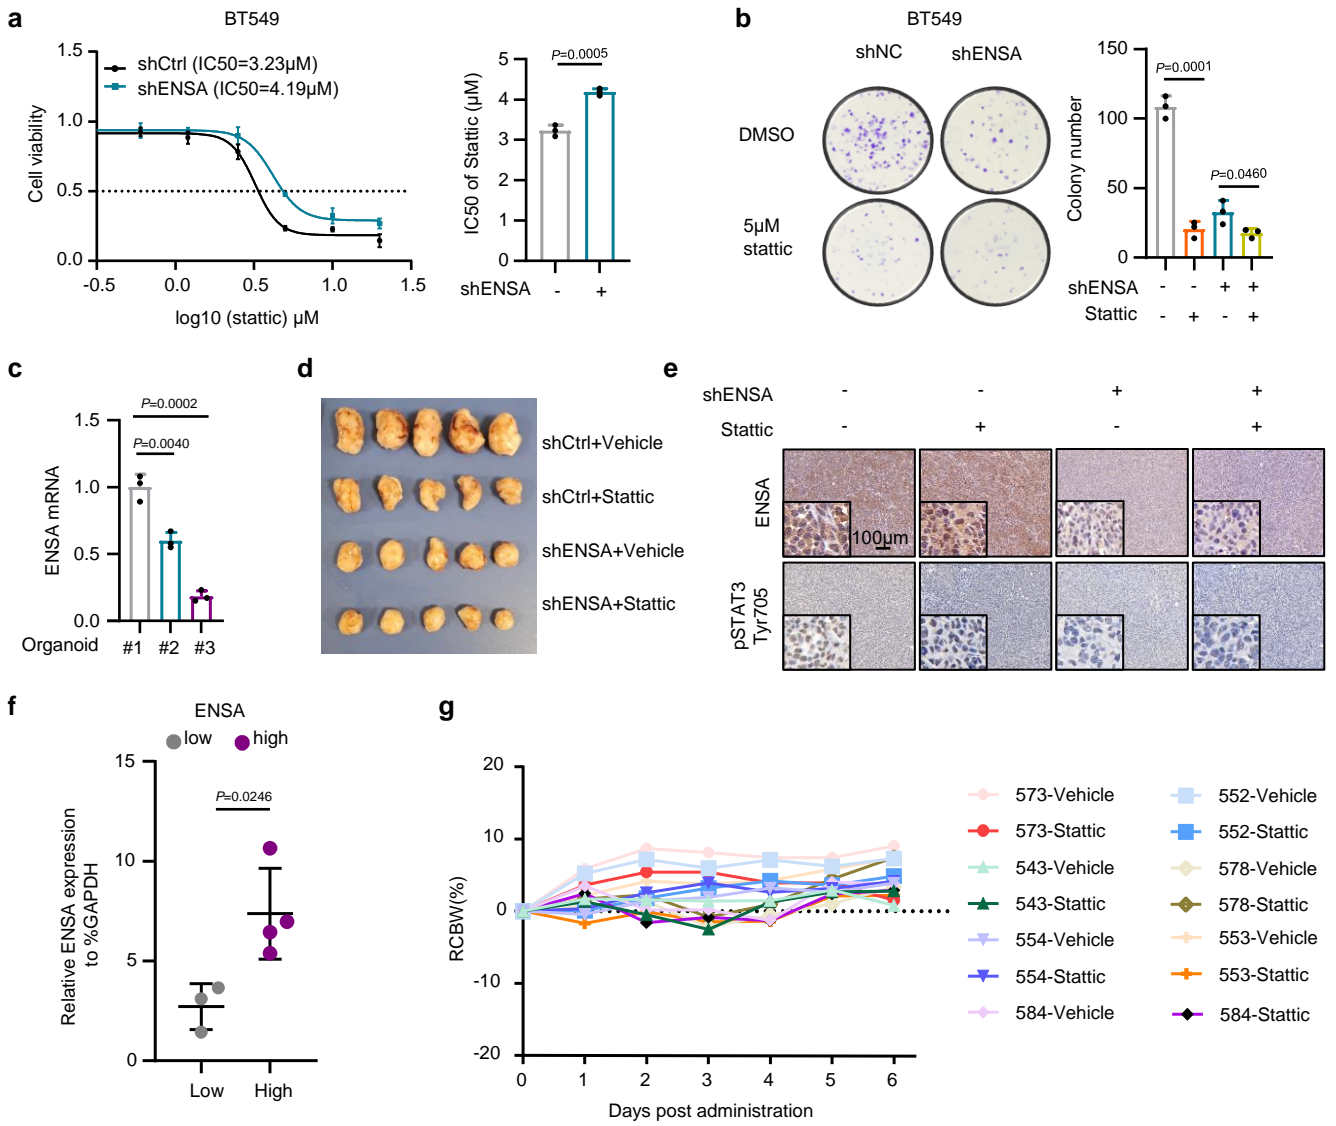

**Supplementary Fig. 7 ENSA determines sensitivity to Stattic in TNBC.** (a) Dose-response curves and half maximal inhibition concentration values of stattic in BT549 cells expressing control or ENSA shRNA. Dose-response curves: n=6; Data are presented as mean  $\pm$  SD. Bar plot: n=3 independent experiments; Data are presented as mean  $\pm$  SD; Two-tailed unpaired Student's t test. (b) Clonogenic survival assays of BT549 cells expressing control or ENSA shRNA and treated with 5  $\mu$ M stattic. n=3. Data are presented as mean  $\pm$  SD. Two-tailed unpaired Student's t test. (c) qRT-PCR detecting relative ENSA mRNA expression in TNBC organoids. n=3. Data are presented as mean  $\pm$  SD. Two-tailed unpaired Student's t test. (d) Representative images of tumors generated by injecting MDA-MB-231 cells expressing control or ENSA shRNA and treating with vehicle or Stattic (10 mg/kg). (e) Immunohistochemical images of ENSA and pSTAT3-Tyr705 in mouse mammary fat pad xenograft models. n=3 independent experiments. (f) qRT-PCR detecting relative ENSA mRNA expression in TNBC mini-PDX models. n=3 in low-ENSA group and n=4 in high-ENSA group. Data are presented as mean  $\pm$  SD. Two-tailed unpaired Student's t test. (g) Relative body weight changes of mini-PDX-bearing mice. Source data are provided as a Source Data file. RCBW, relative change of body weight.

**a**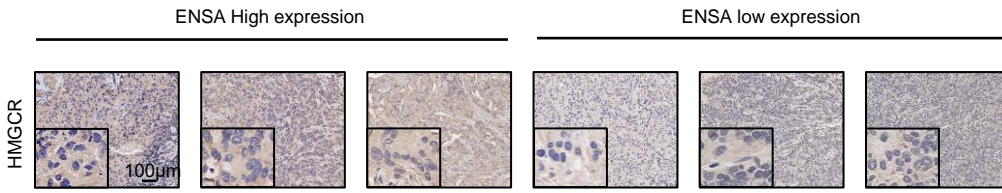**b**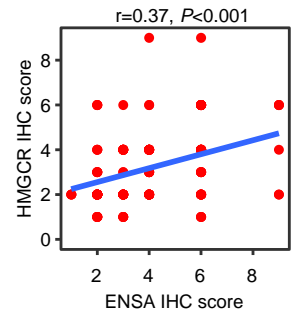**c**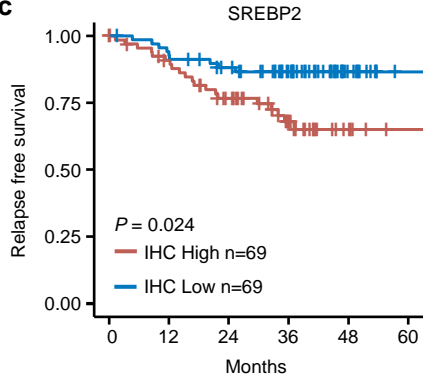**d**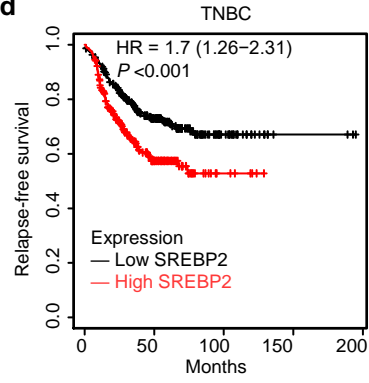**e**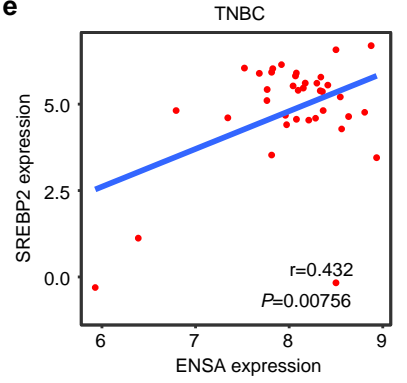

**Supplementary Fig. 8 Correlation of ENSA and downstream pathways.** (a) Representative IHC images of HMGCR staining in 138 TNBC specimens. Representative images are shown. Scale bars, 100  $\mu\text{m}$ . (b) Correlation analysis of ENSA and HMGCR expression levels in 138 TNBC tissues. Correlation coefficients were calculated using the *Spearman* test. Two-tailed *P*-values were given. (c) Kaplan-Meier analysis of SREBP2 IHC expression on the relapse-free survival of 138 TNBC patients. Log-rank test. (d) Kaplan-Meier plots of SREBP2 in TNBC (<https://kmplot.com/analysis/>). Log-rank test. (e) Correlation analysis of ENSA and SREBP2 expression in an Asian breast cancer cohort (SMC cohort, Korea). n=37 TNBC patients. Correlation coefficients were calculated using the *Pearson* test. Two-tailed *P*-values were given. IHC, immunohistochemistry.

**Supplementary Fig. 9** Representative image of FACS sequential gating/sorting strategies of MDA-MB-231 depicted in Supplementary Fig. 3d.

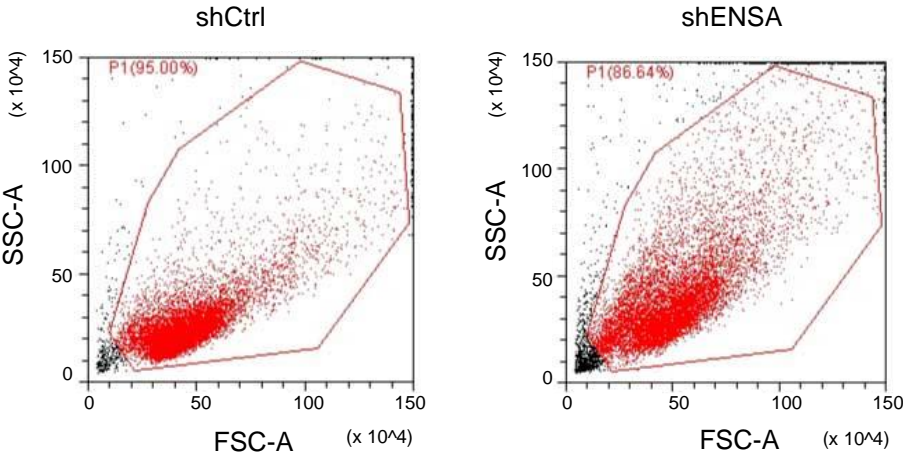

**Supplementary Fig. 10** Representative image of FACS sequential gating/sorting strategies of MDA-MB-231 depicted in Supplementary Fig. 3e.

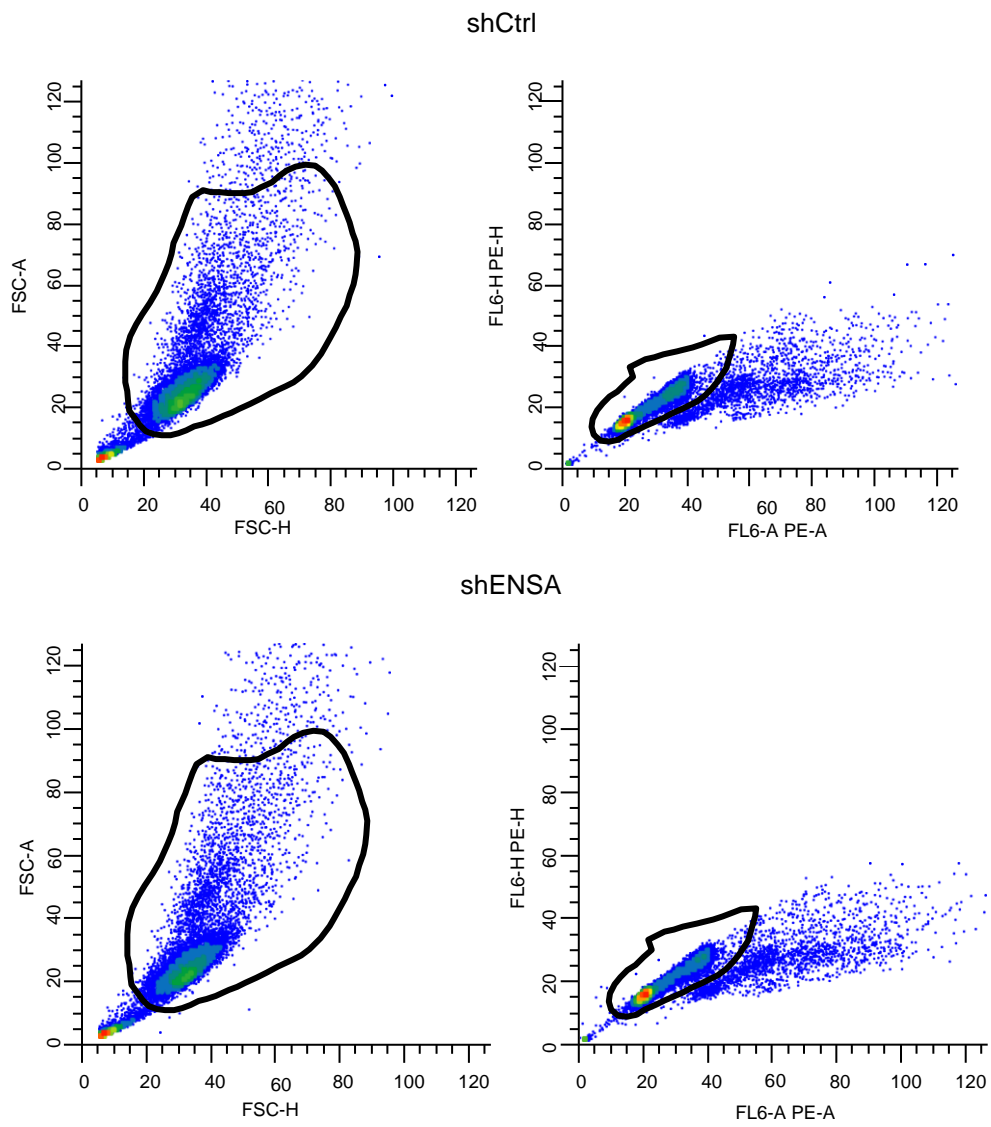



**Supplementary Fig. 11** Representative image of FACS sequential gating/sorting strategies of

MDA-MB-231 depicted in Supplementary Fig. 4f.

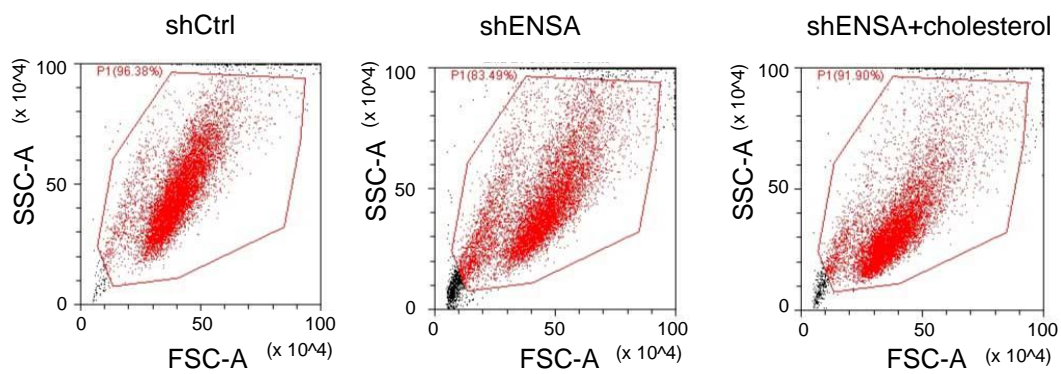

Supplement: 41467_2022_28452_MOESM1_ESM.pdf [file 41467_2022_28452_MOESM1_ESM.pdf]
